# Supplementary material
Source: PubMed Central journal article supplement (PMC3690303)

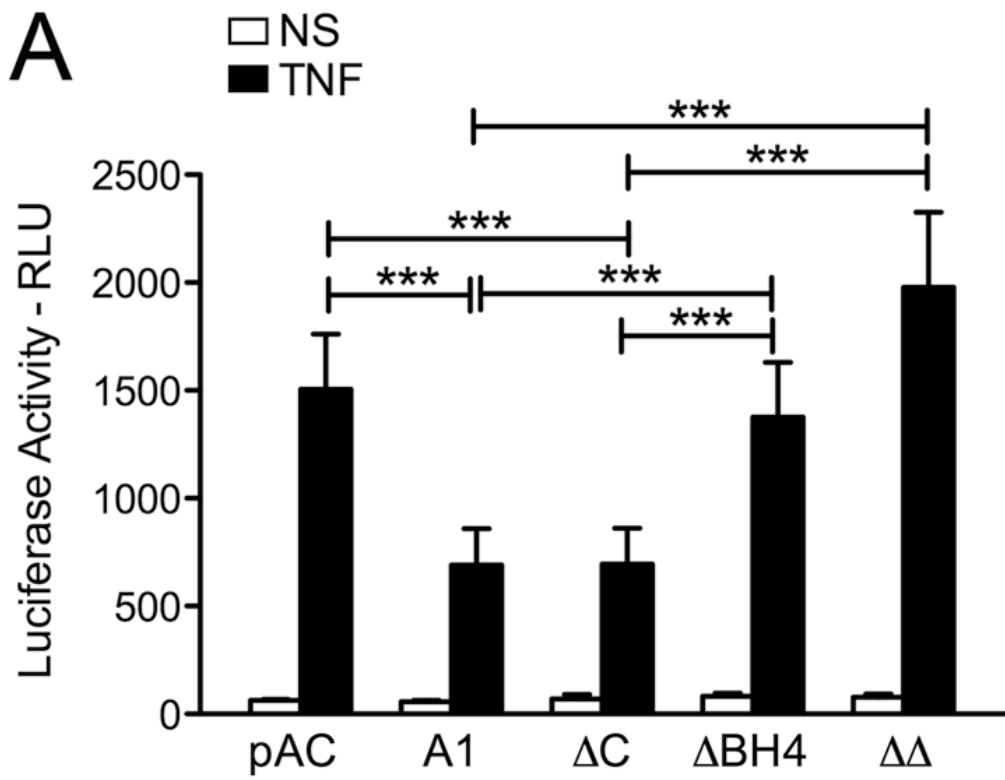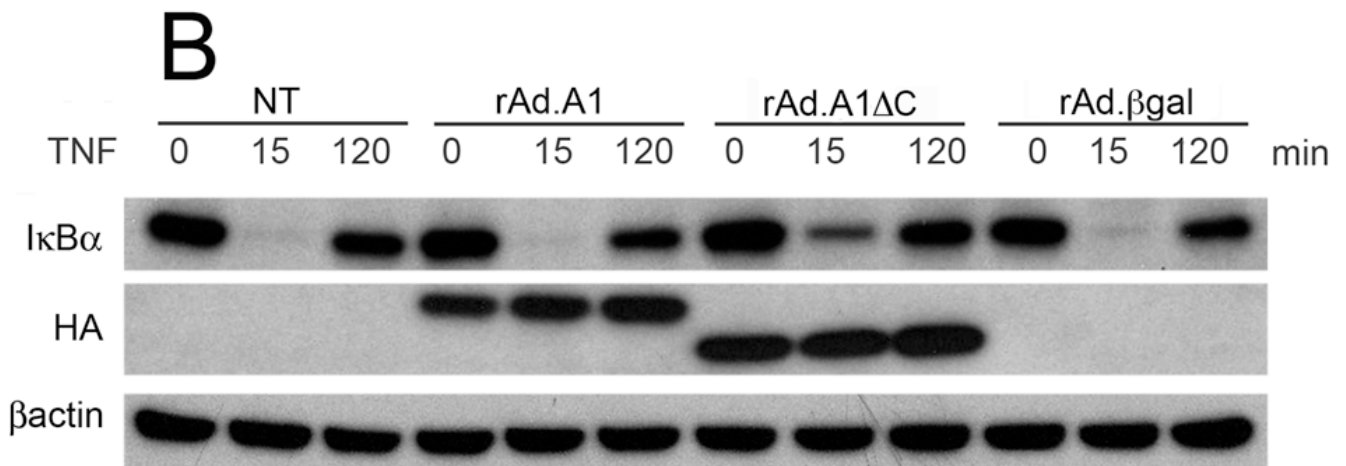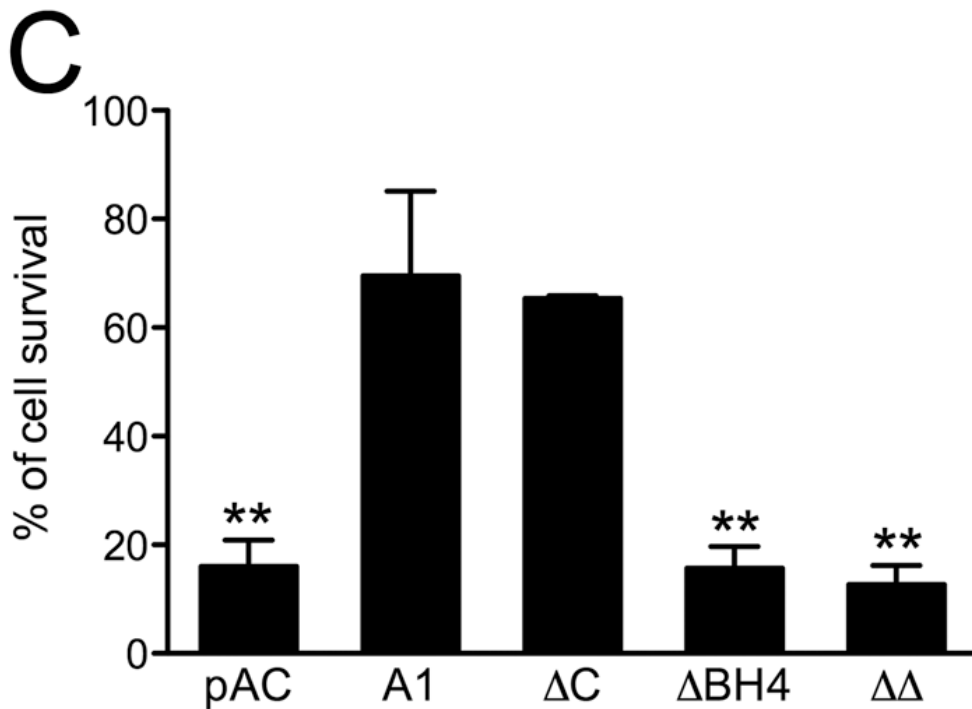

Supplement: NIHMS466828-supplement-02.pdf [file NIHMS466828-supplement-02.pdf]

**A**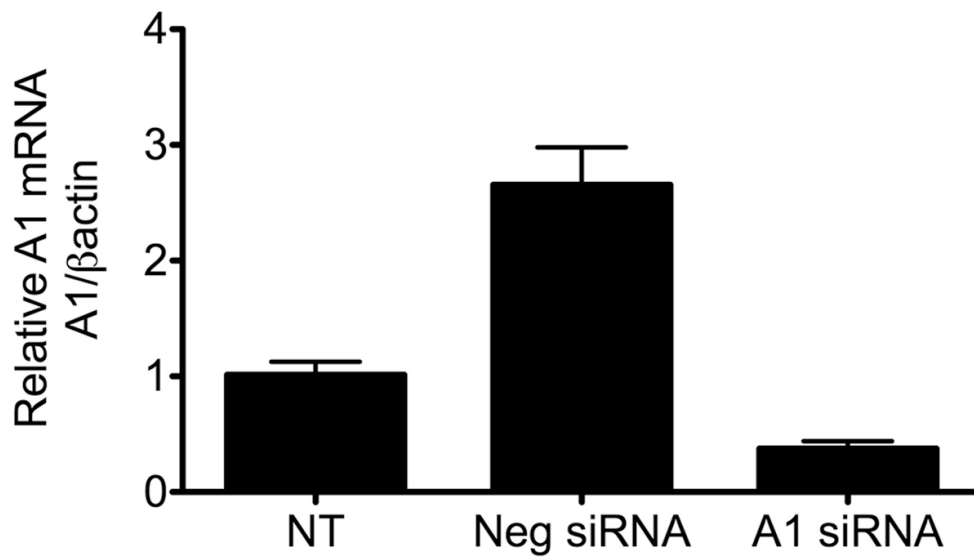**B**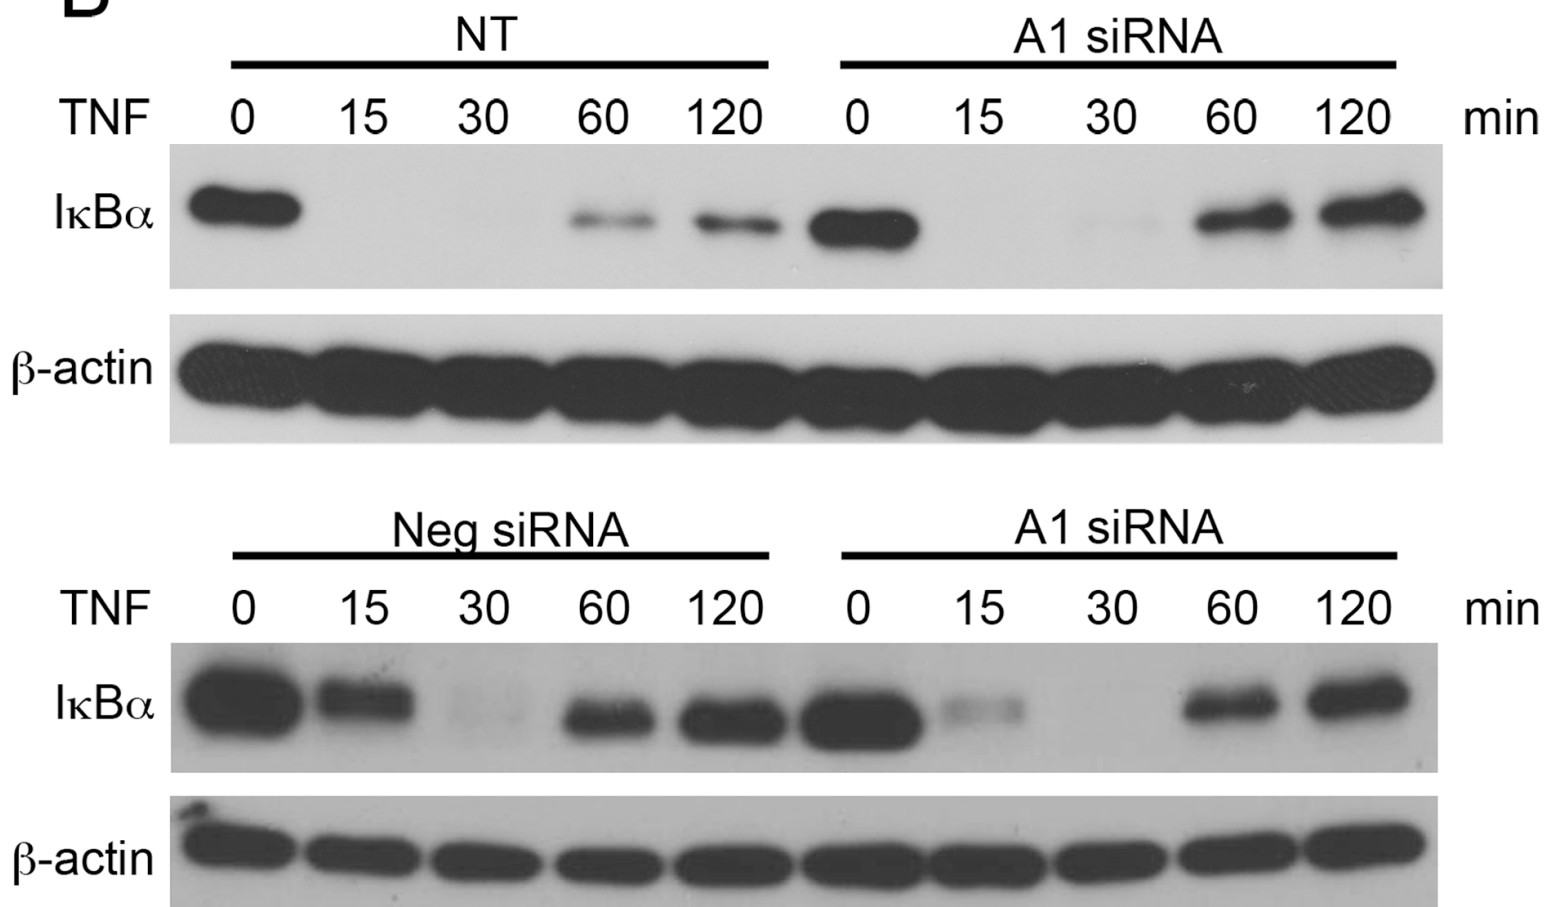

Supplement: NIHMS466828-supplement-03.pdf [file NIHMS466828-supplement-03.pdf]

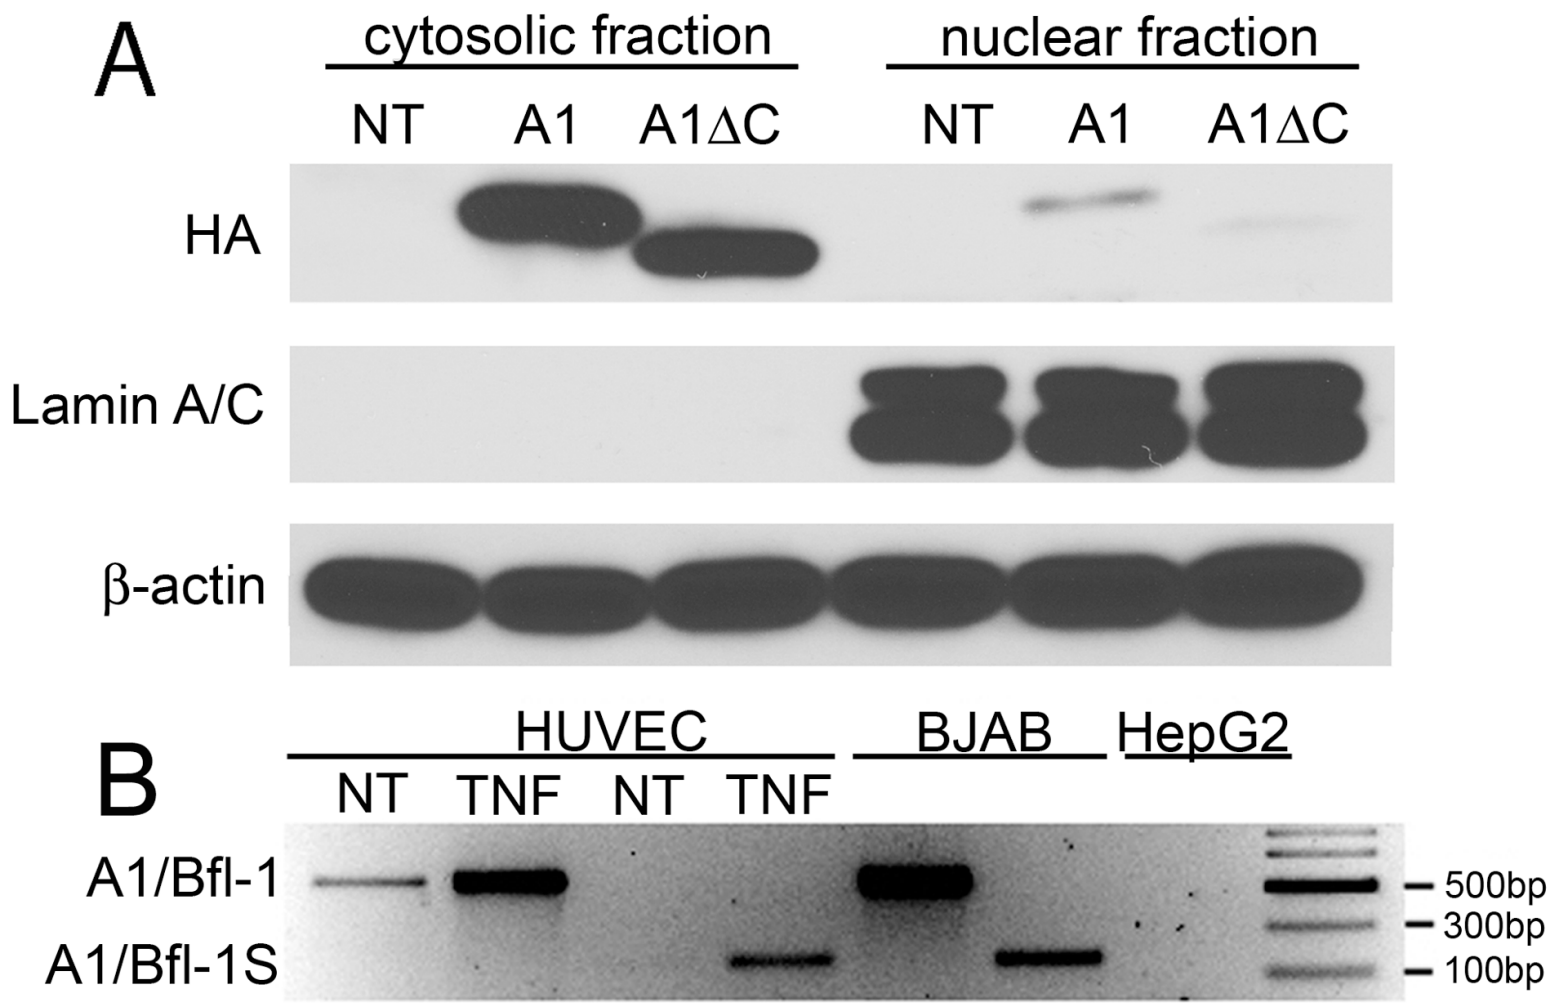

Supplement: NIHMS466828-supplement-04.pdf [file NIHMS466828-supplement-04.pdf]
